# Supplementary material for: Ultra-thin and thin CrSi films on Si(111): II. Transport and magnetic properties
Source: Royal Society of Chemistry journal article supplement (doi:10.1039/d4tc03123g), 2024-12-17
Supplement: d4tc03123g1.pdf [file d4tc03123g1.pdf]

## Ultra-thin and thin CrSi films on Si(111):

### II. Transport and magnetic properties

*Nikolay G. Galkin<sup>1,\*</sup>, Evgenii Yu. Subbotin<sup>1</sup>, Konstantin N. Galkin<sup>1</sup>, Dmitrii L. Goroshko<sup>1</sup>,*

*Olga A. Goroshko<sup>1</sup>, Dmitri B. Migas<sup>2,3</sup>, Andrew B. Filonov<sup>2</sup>, Ivan A. Tkachenko<sup>4</sup>,*

*Aleksei Yu. Samardak<sup>5</sup>*

<sup>1</sup> Institute of Automation and Control Processes, FEB RAS, Radio Str. 5, Vladivostok, Russia

<sup>2</sup> Belarusian State University of Informatics and Radioelectronics, P. Browki 6, 220013 Minsk, Belarus

<sup>3</sup> National Research Nuclear University MEPhI (Moscow Engineering Physics Institute), Kashirskoe shosse 31, 115409, Moscow, Russia

<sup>4</sup> Institute of Chemistry FEB RAS, Prospect 100-letiya Vladivostoka, 159, Vladivostok, Russia

<sup>5</sup> Far Eastern Federal University, Campus, 10 Ajax Bay, Russky Island, 690922, Vladivostok, Russia

\*(e-mail): [galkin@iacp.dvo.ru](mailto:galkin@iacp.dvo.ru)

### SUPPLEMENTARY MATERIALS

**Fig. 1S**

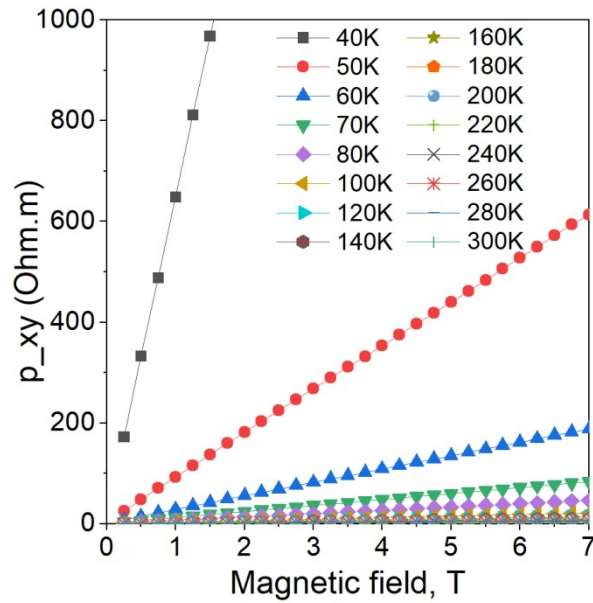

**Fig. 2S**

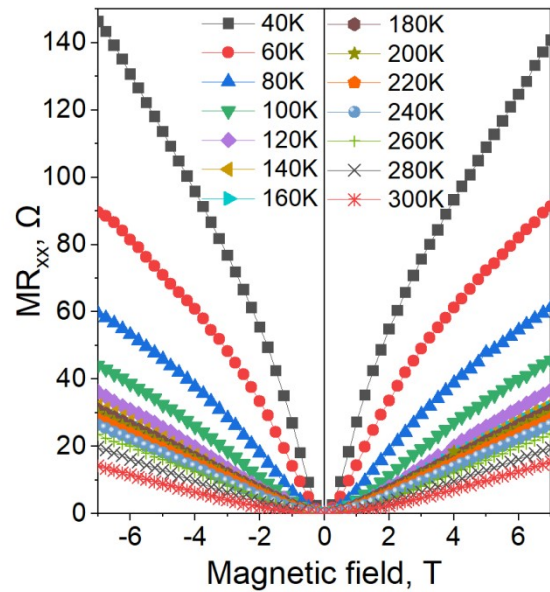

The additional Hall measurements of the *n*-type silicon substrate (FZ1000) after its high-temperature annealing at 1150° C in a high-vacuum camera were done in the Teslatron TP setup. The linear field dependences of Hall resistivity (Fig. 1S) were observed in the applied magnetic field from 0.5 T to 8.0 T and temperatures from 40 K to 300 K. The *n*- to *p*-type conductivity switching occurred after the substrate annealing as confirmed by the Hall coefficient data versus temperature in applied magnetic fields from 0.25 to 8.0 T (not shown). The magneto-resistance field dependence data (Fig. 2S) confirm the non-linear process below 100 K which connected with hole and electron redistribution between layers in the substrate with a *p*-*n* junction. There are strong non-linear dependences, whereas the parabolic  $MR_{xx}(B)$  preserved only at above 270 K.

**Fig. 3S**

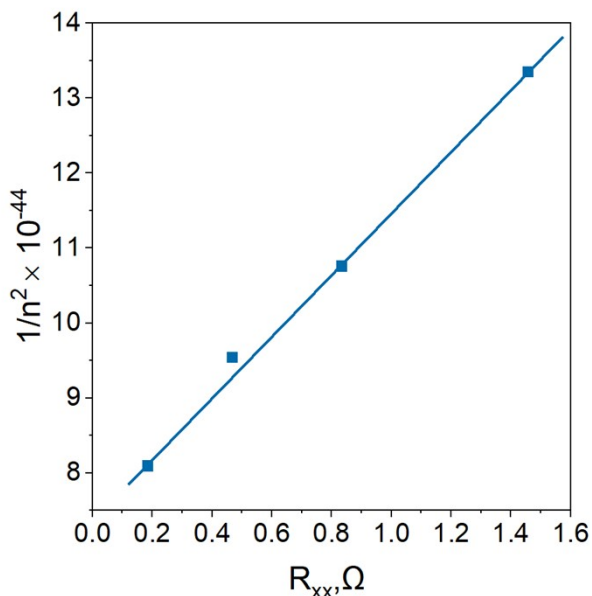

The resistivity tensor components which obtained from the main equation of the Abrikosov's model [A. A. Abrikosov, *Europhys. Lett.*, 2000, 49, 789–793] are:

$$\rho_{xx} = \rho_{yy} = \frac{N_i H}{\pi n^2 e c} \propto H,$$

The carrier concentration ( $n$ ) in the film was obtained from the slope of the UT CrSi film magneto-resistance versus magnetic field (Fig. 3b) at 3 – 30 K and its square reciprocal value versus the magneto-resistance was plotted (Fig. 3S). The scattering center (neutral impurities or defects) concentration ( $N_i$ ) was assumed to be a constant. As seen (Fig. 3S), the obtained  $R_{xx}$  versus  $1/n^2$  dependence corresponds to the magneto-resistance quantization below 30 K in the fields of 0.25 – 7.0 T for the UT CrSi film. Some carrier concentration changes in magnetic field in semimetal can be due to changes in the Fermi level position.
